# Supplementary material for: Association of remnant cholesterol with frailty: findings from observational and Mendelian randomization analyses
Source: PubMed Central journal article supplement (PMC10399004; doi:10.1186/s12944-023-01882-4), 2023-08-03
Supplement: 12944_2023_1882_MOESM2_ESM.pdf [file 12944_2023_1882_MOESM2_ESM.pdf]

## CERTIFICATE OF LANGUAGE EDITING

The English writing of the following manuscript was carefully edited by a native English speaker.

### Manuscript Information

|                                       |                                                                                                                                                                                                                                                                                                                                                                                                                                                                                                                                                                                                                                                                                                                             |
|---------------------------------------|-----------------------------------------------------------------------------------------------------------------------------------------------------------------------------------------------------------------------------------------------------------------------------------------------------------------------------------------------------------------------------------------------------------------------------------------------------------------------------------------------------------------------------------------------------------------------------------------------------------------------------------------------------------------------------------------------------------------------------|
| ID                                    | AE202307120159                                                                                                                                                                                                                                                                                                                                                                                                                                                                                                                                                                                                                                                                                                              |
| Editing date                          | 2023-07-16                                                                                                                                                                                                                                                                                                                                                                                                                                                                                                                                                                                                                                                                                                                  |
| Title                                 | Association of Remnant Cholesterol with Frailty: Findings from Observational and Mendelian Randomization Analyses                                                                                                                                                                                                                                                                                                                                                                                                                                                                                                                                                                                                           |
| Corresponding author                  | Yuanlong Hu                                                                                                                                                                                                                                                                                                                                                                                                                                                                                                                                                                                                                                                                                                                 |
| Language writing before editing       | <input type="checkbox"/> Very poor <input type="checkbox"/> Poor <input checked="" type="checkbox"/> Fair <input type="checkbox"/> Good <input type="checkbox"/> Very good <input type="checkbox"/> Excellent                                                                                                                                                                                                                                                                                                                                                                                                                                                                                                               |
| Recommendation after language editing | <input checked="" type="checkbox"/> Submitting to target journal directly<br><input type="checkbox"/> Submitting to target journal after minor revision<br><input type="checkbox"/> Re-editing required after major revision<br><input type="checkbox"/> Not suitable for publication                                                                                                                                                                                                                                                                                                                                                                                                                                       |
| Overview comments                     | Dear Authors, I am genuinely impressed by the exceptional quality of your research and the diligence displayed in the manuscript's composition. Your study will undeniably make a significant impact on the scientific community. My revisions were intended to further elevate your work, refining the language for greater clarity, and ensuring your findings and insights are effectively and impactfully communicated. In doing so, sentences were restructured and word usage adjusted as needed. These enhancements will augment your work's reach and resonance. I applaud your dedication and thank you for contributing your significant findings to the scientific community. Kindest regards, Phoebe C., Editor |

### Edited by

**Phoebe C.**

Senior editor  
University of Texas  
Language Editing

### Certificate Issued by

**Dr. Jason Qee**

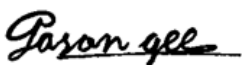

Editor in Chief  
Editorbar Language Editing, Beijing, China  
runse@editorbar.com www.editorbar.com

Certificate link: [www.editorbar.com/order/cert/AE202307120159](http://www.editorbar.com/order/cert/AE202307120159)
