# Supplementary material for: Association of remnant cholesterol with frailty: findings from observational and Mendelian randomization analyses
Source: PubMed Central journal article supplement (PMC10399004; doi:10.1186/s12944-023-01882-4), 2023-08-03
Supplement: 12944_2023_1882_MOESM3_ESM.pdf [file 12944_2023_1882_MOESM3_ESM.pdf]

PAPER NAME

**revision** 查重版本

AUTHOR

-

WORD COUNT

**7051 Words**

CHARACTER COUNT

**40893 Characters**

PAGE COUNT

**30 Pages**

FILE SIZE

**56.7KB**

SUBMISSION DATE

**Jul 18, 2023 7:53 PM GMT+8**

REPORT DATE

**Jul 18, 2023 7:54 PM GMT+8**

### ● 7% Overall Similarity

The combined total of all matches, including overlapping sources, for each database.

- 7% Internet database
- 4% Publications database
- Crossref database
- Crossref Posted Content database

### ● Excluded from Similarity Report

- Bibliographic material
- Quoted material
- Cited material
- Small Matches (Less than 11 words)

# 1 Association of Remnant Cholesterol with Frailty: Findings from 2 Observational and Mendelian Randomization Analyses

## 3 Abstract

4 **Background:** Recent insights suggest that remnant cholesterol (RC) plays a role in cellular  
5 senescence, yet its specific contribution to frailty remains indeterminate. Through the integration  
6 of observational and mendelian randomization (MR) studies, this research explores the impact of  
7 elevated serum RC levels on frailty susceptibility.

8 **Methods:** A dual-method approach, combining an observational study with an MR study, was  
9 employed to investigate the connection between RC and frailty. The observational study  
10 included 11,838 participants from the National Health and Nutrition Examination Survey.  
11 Multivariable logistic regression and propensity score matching were employed to control for  
12 potential confounders. The non-linear relationship was assessed using restricted cubic splines. To  
13 circumvent observational study limitations, a two-sample MR analysis was conducted using the  
14 inverse-variance weighted method, leveraging genome-wide association studies (GWAS) data.

15 **Results:** After adjusting for potential confounding variables, the observational study identified a  
16 significant association between high serum RC levels and frailty in middle-aged and older adults  
17 (odds ratio [OR] = 1.67, 95% confidence interval [CI] = 1.20 to 2.33,  $P = 0.003$ ), exhibiting a  
18 non-linear dose-response correlation (non-linear  $P = 0.011$ ). This association persisted after  
19 propensity score matching (OR = 1.53, 95% CI = 1.14 to 2.06,  $P = 0.005$ ). The MR study echoed  
20 these results, demonstrating a causal association of RC with the frailty index ( $\beta = 0.059$ , 95% CI  
21 = 0.033 to 0.085,  $P = 1.05E-05$ ), consistent with the observational findings ( $\beta = 0.017$ , 95% CI  
22 = 0.008 to 0.026,  $P = 4.51E-04$ ).

23 **Conclusion:** This study provides evidence that higher RC levels amplify frailty risk in middle-  
24 aged and older adults, implying that the reduction of RC levels may present a promising strategy  
25 for frailty prevention and management.

26 **Key words:** Frailty, Remnant cholesterol, Aging, Mendelian randomization.

27

## 28 **Introduction**

29 With advancing age, individuals tend to experience a progressive accumulation of health-related  
30 deficits, which eventually leads to cumulating in a state of frailty. This clinical condition,  
31 characterized by vulnerability, signifies severe dysregulation within a biologically complex  
32 dynamical system inherent to the aging process[1–3]. Epidemiological evidence underscores the  
33 high prevalence of frailty among the elderly demographic. For instance, a comprehensive meta-  
34 analysis incorporating 57 studies revealed that frailty affects approximately 26.8% of the aging  
35 population[4]. Given the heightened predisposition of this demographic to adverse clinical  
36 outcomes, there is a growing emphasis on the early identification and modification of risk factors  
37 related to frailty.

38 In the elderly population, frailty is associated with a significantly increased risk for the  
39 development of cardiovascular disease (CVD) and the occurrence of major adverse  
40 cardiovascular events[5,6]. Evidence from a Mendelian randomization (MR) study underscores a  
41 bidirectional causal relationship between frailty and [coronary heart disease \(CHD\)](#)[7]. This  
42 correlation could stem from shared risk factors [8], especially the elevated serum level of  
43 cholesterol. Previous research has indicated a correlation between increased serum levels of low-  
44 density lipoprotein cholesterol (LDL-C) and the risk of frailty[9]. Numerous researches in recent  
45 years have identified remnant cholesterol (RC) as an independent risk factor that contributes to  
46 the occurrence of incident cardiovascular events[10–12]. RC is computed as the difference  
47 between total cholesterol (TC) and the aggregate of high-density lipoprotein cholesterol (HDL-  
48 C) and LDL-C, primarily representing the cholesterol content of a subset of triglyceride-rich  
49 lipoproteins (TRLs)[13]. One proposed mechanism suggests that hydrolyzed products from

50 TRLs may expedite cellular senescence in a range of cells, including endothelial cells, vascular  
51 smooth muscle cells, macrophages, and adipose-derived mesenchymal stem cells (AMSC)[14].  
52 While direct evidence is available for AMSC, supporting evidence for other cell types remains  
53 largely indirect[15]. Cellular senescence at the cellular level is a crucial mechanism driving  
54 frailty[16]. However, the exact mechanism through which RC is associated with the risk of  
55 frailty remains to be elucidated.

56 <sup>10</sup> The aim of this study was to examine the potential association between RC and frailty through  
57 two distinct, yet complementary approaches. The initial phase of the investigation involved an  
58 observational study using <sup>1</sup> data from the National Health and Nutrition Examination Survey  
59 (NHANES) to assess the association. However, acknowledging the limitations of observational  
60 studies, primarily the prevalence of confounding factors and potential for reverse causality, a MR  
61 study was also employed. In the MR study, genetic variants that influence serum remnant  
62 cholesterol levels were utilized as instrumental variables, simulating the conditions of a  
63 randomized experiment. This technique leverages the natural random distribution of genetic  
64 variants during gamete formation and conception, thereby effectively mitigating confounding  
65 elements and the risk of reverse causality. Such an approach provides a more robust evidence  
66 base supporting any potential causal link between RC and frailty[17].

67

## 68 **Materials and Methods**

### 69 *Study Population for the Observational Epidemiological Study*

70 The present observational study leveraged data across eight NHANES cycles spanning from  
71 2003–2004 through 2017–2018. The NHANES is a nationally representative survey dedicated to  
72 assessing the health and nutritional condition of both adult and pediatric populations in the

73 United States[18]. The inclusion criteria for [this](#) study specified non-institutionalized individuals  
74 aged 40 years and above who had undergone lipid profiling. Subjects with triglyceride levels  
75 equal to or exceeding 400 mg/dl were excluded from the study. Protocols #98-12, #2005-06,  
76 #2011-17, and #2018-01 were granted approval by the Institutional Review Board of the  
77 National Center for Health Statistics (NCHS)[19].

### 78 *Measurement of Variables in the Observational Epidemiological Study*

79 For this observational epidemiological study, the primary exposure variables comprised of RC,  
80 RC-to-TC ratio, and TC-to-LDL-C ratio. RC was deduced by subtracting HDL-C and LDL-C  
81 from TC. As LDL-C direct measurements were not provided by NHANES, its levels for the  
82 primary analyses were calculated using the Martin-Hopkins equation[20]. A preceding study[21]  
83 demonstrated that the Martin-Hopkins equation provides more accurate estimations of LDL-C  
84 (for triglyceride levels of < 400 mg/dl) compared to the Friedewald[22] and Sampson  
85 equations[23]. For comparison, LDL-C values were also computed using the Friedewald and  
86 Sampson equations.

87 Frailty status, defined by the [frailty index \(FI\)](#), was identified as the primary outcome measure.  
88 [FI was determined using 49 accessible items, based on the deficit accumulation approach](#)  
89 [proposed by Rockwood et al. \(Supplementary Table 1\)\[24\].](#) FI was computed by dividing <sup>7</sup>the  
90 [sum of deficits by the total number of items, yielding a score between 0 and 1.](#) Participants  
91 possessing an FI greater than 0.21 were classified as frail[25,26]. [Concurrently, the Fried frailty](#)  
92 [phenotype \(FP\) was assessed according to a formerly published method\[27\]; meeting at least](#)  
93 [three criteria was deemed indicative of frailty\[3\].](#)

94 The study accounted for various covariates, including sociodemographic attributes,  
95 socioeconomic status, lifestyle behaviors, frailty-associated risk factors, clinical comorbidities,  
96 and current medications. The sociodemographic variables included age, gender, ethnicity,  
97 education level, and marital status. Household income as a percentage of the federal poverty  
98 level (FPL) was utilized to gauge the socioeconomic status, categorized as poor ( $\leq$  100% FPL),  
99 near poor (101–200% FPL), or non-poor ( $>$  200% FPL). The healthy eating index - 2015  
100 (HEI-2015) was employed to evaluate dietary behaviors, which assesses adherence to the 2015–  
101 2020 Dietary Guidelines for Americans. The smoking status was segmented into three  
102 categories: never, former, or current. “Never smokers” were those who smoked fewer than 100  
103 cigarettes throughout their lifetime. “Current smokers” referred to those who consumed more  
104 than 100 cigarettes in their lifetime and were still active smokers. “Former smokers” were those  
105 who ceased smoking after consuming more than 100 cigarettes. The study also included frailty-  
106 related risk factors such as body mass index (BMI), systolic blood pressure (SBP), diastolic  
107 blood pressure (DBP), and estimated glomerular filtration rate (eGFR), which was computed  
108 using creatinine-based eGFR (eGFR<sub>Cr</sub>) via the CKD-EPI (CKD Epidemiology Collaboration)  
109 equations[28]. Self-reported histories of cardiovascular disease (CVD) and Type 2 diabetes  
110 mellitus (T2DM) were counted as clinical comorbidities. CVD was defined as self-reported  
111 instances of CHD, congestive heart failure (HF), heart attacks, strokes, or angina. The study also  
112 accounted for covariates, which included information on the current usage of specific  
113 medications, such as statins, anti-diabetic drugs, and anti-hypertensive drugs.

#### 114 *Data Source for Mendelian Randomization Study*

115 In the MR analyses, <sup>9</sup> summary-level data from large-scale genome-wide association studies  
116 (GWAS) were utilized to assess the potential causal influence of RC on frailty. The GWAS  
117 summary data for RC was procured from the UK Biobank, encompassing data from 115,082  
118 participants[29]. The quantification of remnant cholesterol was computed as the TC minus the  
119 sum of LDL-C and HDL-C. The TC, LDL-C, and HDL-C values were acquired through high-  
120 throughput nuclear magnetic resonance metabolomics conducted by Nightingale Health  
121 (biomarker quantification version 2020)[29]. The data were subsequently adjusted for variables  
122 such as age, sex, fasting status, and the genotyping array.

123 The GWAS summary data for the FI was derived from a meta-analysis of UK Biobank  
124 participants of European descent (N = 164,610) and Swedish TwinGene participants  
125 (N = 10,616)[30]. The UK Biobank participants were aged between 60 to 70 years, and the  
126 Swedish TwinGene participants ranged from 41 to 87 years. During the GWAS meta-analysis,  
127 covariate adjustments were made for age, sex, assessment center, and the genotyping array. [The](#)  
128 [GWAS summary data for the FP was obtained from the study conducted by Ye et al., involving](#)  
129 [386,565 individuals of European ancestry from the UK Biobank\[31\]. The GWAS summary](#)  
130 [statistics are compiled in Supplementary Table 2.](#)

### 131 *Selection of Genetic Instruments*

132 [This](#) study entailed the selection of [single nucleotide polymorphisms \(SNPs\)](#) that exhibited a  
133 significant association with RC, FI, or FP ( $P < 5 \times 10^{-8}$ ), and independent segregation  
134 ( $R^2 < 0.001$ , within a 5000 kb window), with no evidence of linkage disequilibrium (LD). A  
135 [clumping algorithm employed](#), referencing the 1000 genomes panel, to identify and exclude  
136 SNPs displaying LD. Furthermore, SNPs demonstrating palindrome alleles (A/T or G/C), which



137 could potentially lead to strand ambiguity issues, were excluded from the study. The F-statistic  
138 was computed using a formula outlined in prior research, and SNPs demonstrating an F-statistic  
139 exceeding 10 were deemed as strong genetic instrumental variables (IVs) for RC level, consistent  
140 with the Staiger-Stock rule[32,33].

### 141 *Statistical Analysis of Observational Epidemiological Study*

142 All analyses were performed using sampling weights, strata, and primary sampling units to  
143 ensure the derivation of nationally representative estimates. To circumvent the reduction in  
144 sample size attributable to missing covariate data, these gaps were filled in using the missForest  
145 method within the missForest R package. Spearman rank correlation coefficient tests were  
146 conducted to analyze the correlation between LDL-C values as calculated by different formulas.

147 Logistic regression analyses were employed to determine the association between RC, RC-to-TC  
148 ratio, RC-to-LDL-C ratio, and the likelihood of frailty. Further, FI, treated as a continuous  
149 outcome variable, was included in the linear regression model for subsequent re-analysis. We  
150 utilized two different methods to correct for the influence of confounding factors. The presence  
151 of multicollinearity was verified using the generalized variance inflation factor (GVIF), with  
152 variables exhibiting a GVIF > 10 excluded from the model. Three models were fitted in a  
153 stepwise manner. Model 1 adjusted for age (continuous), gender (female and male), ethnicity  
154 (white, black, or other), education level (below high school, or high school and above), family  
155 income (poor, near poor, or non-poor), and marital status (non-married or married). Model 2  
156 accommodated the variables in model 1 and also adjusted for smoking status (never, former, or  
157 current) and HEI-2015 (quartile). Model 3 incorporated the variables from model 2 and further  
158 adjusted for BMI (continuous), SBP (continuous), DBP (continuous), eGFR level ( $\geq 90$ , 60 to

159 89, and  $< 60$  mL/min per  $1.73 \text{ m}^2$ ), CVD (no or yes), T2DM (no or yes), statins use (no or yes),  
160 anti-diabetic drug use (no or yes), and anti-hypertensive drug use (no or yes). For RC, model 4  
161 was created, which included TC (continuous) and LDL-C (continuous) adjustments in addition to  
162 the variables in model 3. Secondly, a 1:1 propensity score matching (PSM) method was  
163 employed to control for potential confounding variables, considering all variables in model 3 and  
164 sampling weights. The nearest-neighbor matching was conducted within a caliper of 0.05 on the  
165 propensity score scale, using the MatchIt R package. Lastly, to model a potential dose-response  
166 relationship of RC with frailty, the restricted cubic splines (RCS) with three knots were applied.  
167 The relationship between RC, the RC-to-TC ratio, and the RC-to-LDL-C ratio with the  
168 likelihood of frailty was scrutinized in various demographic subgroups. These were divided by  
169 age ( $< 60$  and  $\geq 60$  years), gender (female and male), BMI ( $< 30$  and  $\geq 30 \text{ kg/m}^2$ ), eGFR level  
170 ( $\geq 90$ , 60 to 89, and  $< 60$  mL/min per  $1.73 \text{ m}^2$ ), presence of CVD or T2DM (no or yes), and  
171 hypertension (no or yes) in the logistic models. Hypertension was defined as SBP  $\geq 140$  mmHg,  
172 DBP  $\geq 90$  mmHg, or current utilization of anti-hypertensive medications. The multiplicative  
173 interaction and the determination of effect size variations among different population subgroups  
174 were assessed via likelihood ratio tests.

175 Complementary sensitivity analyses were conducted. Firstly, the association of RC with frailty  
176 was re-evaluated excluding heart failure, coronary heart disease, angina, heart attack, stroke, and  
177 T2DM from the FI. Subsequently, differing strategies for managing missing values were  
178 employed for sensitivity analysis, encompassing direct deletion of missing values and multiple  
179 imputation. Ten complete datasets were synthesized via multiple imputation using the mice R  
180 package. Given the intricate sampling design, results were consolidated in accordance with

181 Rubin's rule, utilizing the survey and mitools R packages in R. Finally, the results generated  
182 using the Friedewald equation and Sampson equation were juxtaposed with the principal results.  
183 All computations were conducted using R and RStudio software. To correct for the three tested  
184 null-hypotheses, Bonferroni adjustment was applied (Bonferroni:  $0.05/3 = 0.017$ ). A  
185  $P$ -value  $< 0.017$  was considered as being statistically significant.

### 186 *Mendelian Randomization Analysis*

187 The causal effect of RC on the FI or FP was assessed employing the multiplicative random-  
188 effects inverse-variance weighted (IVW) method, undeterred by heterogeneity statistics.  
189 Additional MR methods, including weighted median, MR-Egger, simple median, and MR  
190 Pleiotropy RESidual Sum and Outlier (MR-PRESSO) were incorporated into the data analysis  
191 process. Reverse direction MR was conducted to evaluate any pre-existing reverse-direction  
192 causal association. The MR-Steiger directionality test was employed to validate causality  
193 directionality[34]. Multivariable MR, facilitated by the IVW method, was utilized to estimate the  
194 direct causal impact of RC on the FI, incorporating adjustments for TC, LDL-C, BMI, CHD, HF,  
195 stroke, T2DM, SBP, and DBP. The execution of these methods relied on the TwoSampleMR  
196 (version 0.5.6)[35] and MRPRESSO (version 1.0) R packages [36].  
197 Three strategies were implemented to test for potential pleiotropy. First, the intercept test from  
198 MR-Egger regression served as the principal method to identify directional pleiotropy. The  
199 PhenoScanner web tool was utilized next, aiming to identify SNPs linked to potential  
200 confounders; such SNPs were then extracted from the IVs before re-analysis of the primary  
201 results[37]. The MR-PRESSO test was subsequently employed to identify and rectify horizontal  
202 pleiotropy through the MRPRESSO (version 1.0) R package[36]. Heterogeneity was quantified

203 using the Cochran's Q Statistic and  $I^2$  value, supported by visual assessment via funnel plot.  
204 After removing SNPs resulting in the heterogeneity, the main results were re-analyzed. After  
205 SNPs contributing to heterogeneity were removed, the primary results were revisited. [The MRlap](#)  
206 [\(version 0.0.3.0\) R package](#) was used to account for and rectify potential bias induced by sample  
207 [overlap](#)[38].

208

## 209 **Results**

### 210 *Observational Epidemiological Analysis for Association of RC with Frailty*

211 The study incorporated a total of 11,838 participants as delineated in Figure 1. Given the  
212 sampling design, this represents a potential sampling of 58.32 million. <sup>18</sup> A summary of the  
213 population characteristics is presented in Table 1. The participants' average age was 59 (standard  
214 deviation [SD] 11.90), with 52.43% (6,059) being female. The average FI was 0.160 with a  
215 standard deviation of 0.002, and 24.88% of participants were categorized as frail according to  
216 the FI. Frail participants, in comparison to non-frail participants, were found to be older, with a  
217 higher BMI, higher SBP, lower DBP, lower eGFR, lower HEI-2015, and had a higher prevalence  
218 of CVD or T2DM. Correlation tests using Spearman method identified a significant positive  
219 correlation between LDL-C as determined by the Martin-Hopkins equation and the Friedewald  
220 equation (Spearman correlation = 0.988,  $P < 2.2E-16$ ), as well as the Sampson equation  
221 (Spearman correlation = 0.998,  $P < 2.2E-16$ ), as depicted in Supplementary Figure 1.

222 Upon adjusting for potential confounders, the study [found a positive correlation between](#)  
223 [elevated serum RC levels and frailty as determined by FI \(Figure 2\)](#). In particular, [the adjusted](#)  
224 [odds ratio \(OR\) of frailty for RC \(calculated by the Martin-Hopkins equation\) was determined as](#)

225 1.67 (95% CI = 1.20 to 2.33,  $P = 0.003$ ). A 1 mmol/L increase in serum levels of RC was  
226 associated with a 0.017 unit increase in continuous FI ( $\beta = 0.017$  per 1 mmol/L increase in RC  
227 levels, 95% CI = 0.008 to 0.026,  $P = 4.51E-04$ ). No multicollinearity was detected among the  
228 independent variables in model 3, as confirmed by the GVIF values (Supplementary Figure 3).  
229 The relationship remained statistically significant after further adjusting for total cholesterol and  
230 LDL-C (model 4; Figure 2). PSM achieved a satisfactory balance between the covariates in non-  
231 frail and frail groups (Supplementary Table 4), and RC maintained a significant correlation with  
232 the likelihood of frailty (OR = 1.53 per 1 mmol/L increase in RC levels, 95% CI = 1.14 to 2.06,  
233  $P = 0.005$ ). Nevertheless, there was no notable correlation detected between higher serum levels  
234 of RC and frailty as defined by FP (OR = 1.32 per 1 mmol/L increase in RC levels, 95% CI =  
235 0.87 to 2.01,  $P = 0.192$ ), as shown in Supplementary Table 5. Additionally, our study revealed a  
236 positive correlation between elevated levels of the RC-to-TC ratio, the RC-to-LDL-C ratio, and  
237 frailty as defined by both FI (Figure 2) and FP (Supplementary Table 5).

238 Figure 3 depicts the use of restricted cubic splines to illustrate the dose-response association  
239 between serum RC levels and the likelihood of frailty. The findings indicate that the dose-  
240 response relationship of serum RC levels (non-linear  $P = 0.011$ ) and the RC-to-LDL-C ratio  
241 (non-linear  $P = 6.00E-04$ ) with frailty displayed non-linearity. Conversely, the relationship  
242 between the RC-to-TC ratio and the likelihood of frailty was linear (non-linear  $P = 0.620$ ). Two-  
243 segment piecewise regression models with inflection point of the curve were fitted to quantify  
244 the effect of RC above and below the inflection point. Importantly, the likelihood of frailty  
245 remained relatively constant until approximately 0.55 mmol/L of RC (OR = 1.47 per 1 mmol/L  
246 increase in RC levels, 95% CI = 0.40 to 5.43,  $P = 0.564$ ) before observing a swift increase (OR =  
247 2.83 per 1 mmol/L increase in RC levels, 95% CI = 1.54 to 5.20,  $P = 0.001$ ; Supplementary

248 Table 6). Conversely, the likelihood of frailty amplified until around 0.25 (OR = 1.38 per 1  
249 mmol/L increase in RC levels, 95% CI = 1.17 to 1.63,  $P = 2.91E-04$ ), after which the increase  
250 plateaued (OR = 1.06 per 1 mmol/L increase in RC levels, 95% CI = 0.90 to 1.25,  $P = 0.468$ ), as  
251 displayed in Supplementary Table 6.

### 252 *Subgroups and Sensitivity Analyses*

253 The directionality of effect estimates across all evaluated subgroups aligned with the overall  
254 outcomes (Figure 4 and Supplementary Figure 2). Of significance was the association between  
255 serum levels of RC and the likelihood of frailty, which demonstrated statistical significance  
256 irrespective of age subgroup: OR of 2.44 (95% CI = 1.41 to 4.22,  $P = 0.002$ ) for middle-aged  
257 adults (< 60 years), and 1.56 (95% CI = 1.02 to 2.40,  $P = 0.042$ ) for older adults ( $\geq 60$  years).  
258 Corresponding trends were observed for the RC-to-TC ratio and RC-to-LDL-C ratio  
259 (Supplementary Figure 2). No significant interactions were detected (Figure 4 and  
260 Supplementary Figure 2).

261 <sup>3</sup> Three distinct sensitivity analyses were conducted to verify the robustness of the principal  
262 findings. First, the association of RC levels with frailty, as determined by the modified FI, was  
263 verified (Supplementary Table 7). Second, missing data were addressed via two methods, direct  
264 deletion and multiple imputation, confirming that the associations of RC, RC-to-TC ratio, and  
265 RC-to-LDL-C ratio with the likelihood of frailty remained consistent irrespective of the method  
266 applied (Supplementary Table 8 and Supplementary Table 9). Lastly, the congruence between  
267 the results drawn from Friedewald and Sampson equations with the primary findings was  
268 established (Supplementary Table 10 and Supplementary Figure 3).

### 269 *Mendelian Randomization Analysis for Causal Association of RC with Frailty*

270 A total of 51 RC-related, 16 FI-related, and 36 FP-related SNPs, all with F-statistics exceeding  
271 10, were employed as genetic instrumental variables (Supplementary Tables 11–13). The  
272 multiplicative random-effects IVW analysis illuminated a positive correlation between the  
273 genetically inferred heightened level of RC and an increase in FI ( $\beta = 0.059$  per 1 mmol/L  
274 increase in RC levels, 95% CI = 0.033 to 0.085,  $P = 1.05E-05$ ; Table 2). However, no causal  
275 associations between RC and FP were found (Supplementary Table 14).

276 The multivariable MR analysis substantiated a direct effect of RC on FI. Following adjustment  
277 for TC and LDL-C via multivariable MR, the results maintained alignment with the principal  
278 findings ( $\beta = 0.086$  per 1 mmol/L increase in RC levels, 95% CI = 0.012 to 0.161,  $P = 0.024$ ;  
279 Table 3). The associations of RC with FI remained stable, irrespective of adjustment for CHD,  
280 HF, stroke, T2DM, BMI, SBP, or DBP (Table 3).

281 Furthermore, the accuracy of the inferred causal direction was verified using the MR-Steiger test  
282 for directionality. In addition, no significant causal effect of FI on RC was noted (Table 2). The  
283 MRlap analysis comparing observed and corrected effects affirmed consistency (Table 2).

284 High statistical heterogeneity was observed among individual SNP estimates in the analysis of FI  
285 (IVW, Cochran's Q Statistic = 95.04,  $I^2 = 47.39\%$ ,  $P < 0.001$ ; MR-Egger, Cochran's Q Statistic  
286 = 95.03,  $I^2 = 48.44\%$ ,  $P < 0.001$ ) and FP (IVW, Cochran's Q Statistic = 88.18,  $I^2 = 60.31\%$ ,  
287  $P = 1.76E-06$ ; MR-Egger, Cochran's Q Statistic = 87.78,  $I^2 = 61.27\%$ ,  $P = 1.22E-06$ ). Funnel  
288 asymmetry was suggested by the visual inspection of the funnel plot (Supplementary Figure 4).

289 Upon removal of heterogeneity-associated SNPs (rs653178, rs9682783, rs102275, and  
290 rs6601299), heterogeneity was eliminated (IVW, Cochran's Q Statistic = 61.26,  $I^2 = 24.91\%$ ,

291  $P = 0.065$ ; MR-Egger, Cochran's Q Statistic = 0.054,  $I^2 = 26.53\%$ ,  $P = 0.054$ ), while the causal  
292 association maintained significance (Supplementary Table 15).

293 MR-Egger intercept test provided no evidence for directional pleiotropy in assessing the causal  
294 association of RC with FI (Egger intercept =  $7.55 \times 10^{-5}$ ,  $P = 0.954$ ). Utilizing the PhenoScanner  
295 tool, three SNPs (rs12916, rs4876611, and rs653178) that had associations with potential  
296 confounders (BMI, SBP, and/or DBP) were identified in the publicly available summary-level  
297 GWAS data. An additional sensitivity analysis was conducted, excluding these SNPs and the  
298 four previously mentioned SNPs, which yielded similar results of all MR methods  
299 (Supplementary Table 16) and no significant heterogeneity was detected (IVW, Cochran's Q  
300 Statistic = 58.05,  $I^2 = 24.21\%$ ,  $P = 0.076$ ; MR-Egger, Cochran's Q Statistic = 57.89,  $I^2 =$   
301  $25.73\%$ ,  $P = 0.064$ ; Supplementary Table 16).

302

### 303 **Discussion**

304 This study determined that higher establishes a correlation between elevated RC levels and an  
305 increased susceptibility to frailty among middle-aged and older adults. Both observational and  
306 MR studies corroborate this, with sensitivity analysis further strengthening the validity of the  
307 findings. Additionally, a threshold effect was observed in the relationship between RC and  
308 frailty.

309 Despite a lack of direct epidemiological evidence linking serum circulating RC levels to frailty,  
310 recent MR studies have spotlighted the influential role of elevated LDL-C levels in inducing  
311 frailty[9]. Substantial increases in RC levels have been documented in adults consuming high-fat  
312 diets[39]. The same diets administered to mice resulted in a heightened frailty level[40], while



313 simultaneously diminishing the anti-frailty benefits of intermittent fasting[41]. Consequently,  
314 this indirect evidence suggests a connection between higher RC levels and a heightened frailty  
315 risk, which **this** study substantiates.

316 Although increased serum RC levels are regarded as a potent independent risk factor for  
317 CVD[42,43], this analysis reveals that the association between serum RC levels and frailty  
318 persists, even after adjusting for CVD and T2DM. This suggests that the contribution of RC to  
319 frailty risk is not exclusively attributed to a higher susceptibility to CVD. Furthermore, **the**  
320 results from our epidemiological studies and multivariable MR confirm that this association  
321 remains significant, regardless of total cholesterol or LDL-C levels.

322 Individuals exhibiting high RC levels, and therefore a greater frailty risk, should be promptly  
323 identified and intervened, especially those with underlying cardiometabolic conditions such as  
324 coronary heart disease and diabetes. **The findings** suggest that RC is a risk factor for frailty,  
325 which should urge clinicians and researchers to prioritize attention toward such individuals. This  
326 becomes particularly vital as statin therapy, commonly used to lower LDL-C and prevent  
327 cardiovascular incidents, has minimal effect on reducing RC. As such, focusing on managing  
328 elevated RC levels is critical to counteract its potential role in accelerating aging and frailty.

329

### 330 **Strengths and limitations**

331 **This** study offers multiple points of strength. **This study is the first to investigate the correlation**  
332 **between RC and** frailty among non-institutionalized middle-aged and older adults. While the  
333 cross-sectional design of the observational data inherently restricts causal interpretation, efforts  
334 have been undertaken to strengthen causal inferences through the robustness of MR analysis.

335 Furthermore, [this study](#) has found an association of the proportion of RC to TC or LDL-C with  
336 frailty, underscoring a saturation effect.

337 Conversely, this research also exhibits certain limitations that warrant acknowledgment. The  
338 LDL-C levels reported in the observational study were not direct measurements but rather,  
339 estimated values, thereby introducing [potential measurement bias](#). However, [this risk has been](#)  
340 [mitigated](#) by employing three different equations to predict LDL-C levels and subsequently  
341 comparing the results. Additionally, the study's reliance on NHANES data that predominantly  
342 features individuals of white ancestry could potentially restrict the broader applicability of the  
343 findings to diverse populations. Another limitation pertains to the non-linear MR design, which  
344 was constrained by the unavailability of individual-level GWAS data that is publicly accessible.  
345 Lastly, the FI utilized in this research was dependent on self-reported data, a factor that could  
346 lead to potential reporting bias.

347

## 348 **Conclusion**

349 To summarize, [this research](#), through a combined observational and MR study, [provides](#)  
350 compelling evidence that an elevated RC level amplifies the risk of frailty in middle-aged and  
351 older adults. Interventions aimed at decreasing RC levels and the proportion of RC to TC or  
352 LDL-C could potentially confer benefits in the prevention and management of frailty. This  
353 underscores the importance of developing innovative therapies aiming at reducing the risk of  
354 [frailty](#).

355

356

357 **Declarations**

358 **Ethics approval and consent to participate**

359 Not applicable.

360 **Consent for publication**

361 Not applicable.

362 **Availability of data and materials**

363 This data can be found at: Publicly available datasets were analyzed in this study. The summary-  
364 level GWAS data of frailty index was downloaded from the NHGRI-EBI Catalog of human  
365 genome-wide association studies (GWAS Catalog, <https://www.ebi.ac.uk/gwas/home>), including  
366 remnant cholesterol (ID: GCST90092943), total cholesterol (ID: GCST90092985), low-density  
367 lipoprotein cholesterol (ID: GCST90092883), frailty index (ID: GCST90020053), body mass  
368 index (ID: GCST006900), CHD (ID: GCST003116), T2DM (ID: GCST006867), HF (ID:  
369 GCST009541), stroke (ID: GCST005838), SBP (ID: GCST006624), and DBP (ID:  
370 GCST006630). The NHANES data was downloaded from the National Center for Health  
371 Statistics website (<https://www.cdc.gov/nchs/nhanes/index.htm>).

372 **Competing interests**

373 The author has no conflict of interest to disclose.

374 **Funding**

375 This work was supported by the National Natural Science Foundation of China (Grant no.  
376 81974566) and the Jinan "University 20" Project (Grant no. 2020GXRC017).

377 **Authors' contributions**

378 YLH conducted analyses and wrote the article. XJW, LL, JMH, LZ, and YL collected and  
379 assembled the data. YLH and YLL conceived the study design. All authors have contributed to

380 the interpretation of the results and have critically revised the content of the manuscript. All  
381 authors agree to be accountable for all aspects of the work.

## 382 **Acknowledgements**

383 Not applicable

384

## 385 **References**

386 1. Hoogendijk EO, Afilalo J, Ensrud KE, Kowal P, Onder G, Fried LP. Frailty: implications for  
387 clinical practice and public health. *The Lancet*. 2019;394:1365–75.

388 2. Fried LP, Cohen AA, Xue Q-L, Walston J, Bandeen-Roche K, Varadhan R. The physical  
389 frailty syndrome as a transition from homeostatic symphony to cacophony. *Nat Aging*.  
390 2021;1:36–46.

391 3. Fried LP, Tangen CM, Walston J, Newman AB, Hirsch C, Gottdiener J, et al. Frailty in older  
392 adults: evidence for a phenotype. *J Gerontol A Biol Sci Med Sci*. 2001;56:M146-156.

393 4. Veronese N, Custodero C, Cella A, Demurtas J, Zora S, Maggi S, et al. Prevalence of  
394 multidimensional frailty and pre-frailty in older people in different settings: A systematic review  
395 and meta-analysis. *Ageing Res Rev*. 2021;72:101498.

396 5. Damluji AA, Chung S-E, Xue Q-L, Hasan RK, Moscucci M, Forman DE, et al. Frailty and  
397 cardiovascular outcomes in the National Health and Aging Trends Study. *Eur Heart J*.  
398 2021;42:3856–65.

399 6. Veronese N, Cereda E, Stubbs B, Solmi M, Luchini C, Manzato E, et al. Risk of  
400 cardiovascular disease morbidity and mortality in frail and pre-frail older adults: Results from a  
401 meta-analysis and exploratory meta-regression analysis. *Ageing Res Rev*. 2017;35:63–73.

- 402 7. Zhu J, Zhou D, Wang J, Yang Y, Chen D, He F, et al. Frailty and cardiometabolic diseases: a  
403 bidirectional Mendelian randomisation study. *Age Ageing*. 2022;51:afac256.
- 404 8. Piotrowicz K, Gařowski J. Risk Factors for Frailty and Cardiovascular Diseases: Are They the  
405 Same? *Adv Exp Med Biol*. 2020;1216:39–50.
- 406 9. Wang Q, Wang Y, Lehto K, Pedersen NL, Williams DM, Hägg S. Genetically-predicted life-  
407 long lowering of low-density lipoprotein cholesterol is associated with decreased frailty: A  
408 Mendelian randomization study in UK biobank. *EBioMedicine*. 2019;45:487–94.
- 409 10. Castañer O, Pintó X, Subirana I, Amor AJ, Ros E, Hernáez Á, et al. Remnant Cholesterol,  
410 Not LDL Cholesterol, Is Associated With Incident Cardiovascular Disease. *J Am Coll Cardiol*.  
411 2020;76:2712–24.
- 412 11. Langsted A, Madsen CM, Nordestgaard BG. Contribution of remnant cholesterol to  
413 cardiovascular risk. *J Intern Med*. 2020;288:116–27.
- 414 12. Wadström BN, Wulff AB, Pedersen KM, Jensen GB, Nordestgaard BG. Elevated remnant  
415 cholesterol increases the risk of peripheral artery disease, myocardial infarction, and ischaemic  
416 stroke: a cohort-based study. *Eur Heart J*. 2022;43:3258–69.
- 417 13. Varbo A, Benn M, Nordestgaard BG. Remnant cholesterol as a cause of ischemic heart  
418 disease: Evidence, definition, measurement, atherogenicity, high risk patients, and present and  
419 future treatment. *Pharmacology & Therapeutics*. 2014;141:358–67.
- 420 14. Xiang Q, Tian F, Xu J, Du X, Zhang S, Liu L. New insight into dyslipidemia-induced  
421 cellular senescence in atherosclerosis. *Biol Rev Camb Philos Soc*. 2022;97:1844–67.
- 422 15. Xiang Q-Y, Tian F, Du X, Xu J, Zhu L-Y, Guo L-L, et al. Postprandial triglyceride-rich  
423 lipoproteins-induced premature senescence of adipose-derived mesenchymal stem cells via the

424 SIRT1/p53/Ac-p53/p21 axis through oxidative mechanism. *Aging* (Albany NY).  
425 2020;12:26080–94.

426 16. Liu P, Li Y, Ma L. Frailty in rodents: Models, underlying mechanisms, and management.  
427 *Ageing Research Reviews*. 2022;79:101659.

428 17. Ference BA, Holmes MV, Smith GD. Using Mendelian Randomization to Improve the  
429 Design of Randomized Trials. *Cold Spring Harb Perspect Med*. 2021;11:a040980.

430 18. NHANES - About the National Health and Nutrition Examination Survey [Internet]. 2022  
431 [cited 2022 Dec 30]. Available from: [https://www.cdc.gov/nchs/nhanes/about\\_nhanes.htm](https://www.cdc.gov/nchs/nhanes/about_nhanes.htm)

432 19. National Center for Health Statistics. NHANES - NCHS Research Ethics Review Board  
433 Approval [Internet]. 2021 [cited 2022 May 7]. Available from:  
434 <https://www.cdc.gov/nchs/nhanes/irba98.htm>

435 20. Martin SS, Blaha MJ, Elshazly MB, Toth PP, Kwiterovich PO, Blumenthal RS, et al.  
436 Comparison of a novel method vs the Friedewald equation for estimating low-density lipoprotein  
437 cholesterol levels from the standard lipid profile. *JAMA*. 2013;310:2061–8.

438 21. Sajja A, Li H-F, Spinelli KJ, Blumenthal RS, Virani SS, Martin SS, et al. Discordance  
439 Between Standard Equations for Determination of LDL Cholesterol in Patients  
440 With Atherosclerosis. *J Am Coll Cardiol*. 2022;79:530–41.

441 22. Friedewald WT, Levy RI, Fredrickson DS. Estimation of the concentration of low-density  
442 lipoprotein cholesterol in plasma, without use of the preparative ultracentrifuge. *Clin Chem*.  
443 1972;18:499–502.

444 23. Sampson M, Ling C, Sun Q, Harb R, Ashmaig M, Warnick R, et al. A New Equation for  
445 Calculation of Low-Density Lipoprotein Cholesterol in Patients With Normolipidemia and/or  
446 Hypertriglyceridemia. *JAMA Cardiol*. 2020;5:540–8.

- 447 24. Searle SD, Mitnitski A, Gahbauer EA, Gill TM, Rockwood K. A standard procedure for  
448 creating a frailty index. *BMC Geriatr.* 2008;8:24.
- 449 25. Blodgett J, Theou O, Kirkland S, Andreou P, Rockwood K. Frailty in NHANES: Comparing  
450 the frailty index and phenotype. *Archives of Gerontology and Geriatrics.* 2015;60:464–70.
- 451 26. Clegg A, Bates C, Young J, Ryan R, Nichols L, Ann Teale E, et al. Development and  
452 validation of an electronic frailty index using routine primary care electronic health record data.  
453 *Age Ageing.* 2016;45:353–60.
- 454 27. Fu Z, Zhou T, Dong F, Li M, Lin X, Ma W, et al. Secondhand smoke is positively associated  
455 with pre-frailty and frailty in non-smoking older adults. *Front Psychiatry.* 2022;13:1095254.
- 456 28. Levey AS, Stevens LA, Schmid CH, Zhang Y (Lucy), Castro AF, Feldman HI, et al. A New  
457 Equation to Estimate Glomerular Filtration Rate. *Ann Intern Med.* 2009;150:604–12.
- 458 29. Richardson TG, Leyden GM, Wang Q, Bell JA, Elsworth B, Davey Smith G, et al.  
459 Characterising metabolomic signatures of lipid-modifying therapies through drug target  
460 mendelian randomisation. *PLoS Biol.* 2022;20:e3001547.
- 461 30. Atkins JL, Jylhävä J, Pedersen NL, Magnusson PK, Lu Y, Wang Y, et al. A genome-wide  
462 association study of the frailty index highlights brain pathways in ageing. *Aging Cell.*  
463 2021;20:e13459.
- 464 31. Ye Y, Noche RB, Szejko N, Both CP, Acosta JN, Leasure AC, et al. A genome-wide  
465 association study of frailty identifies significant genetic correlation with neuropsychiatric,  
466 cardiovascular, and inflammation pathways. *GeroScience.* 2023;1–13.
- 467 32. Burgess S, Thompson SG, CRP CHD Genetics Collaboration. Avoiding bias from weak  
468 instruments in Mendelian randomization studies. *Int J Epidemiol.* 2011;40:755–64.

469 33. Pierce BL, Ahsan H, Vanderweele TJ. Power and instrument strength requirements for  
470 Mendelian randomization studies using multiple genetic variants. *Int J Epidemiol.* 2011;40:740–  
471 52.

472 34. Hemani G, Tilling K, Smith GD. Orienting the causal relationship between imprecisely  
473 measured traits using GWAS summary data. *PLOS Genetics.* 2017;13:e1007081.

474 35. Hemani G, Zheng J, Elsworth B, Wade KH, Haberland V, Baird D, et al. The MR-Base  
475 platform supports systematic causal inference across the human phenome. Loos R, editor. *eLife.*  
476 2018;7:e34408.

477 36. Verbanck M, Chen C-Y, Neale B, Do R. Detection of widespread horizontal pleiotropy in  
478 causal relationships inferred from Mendelian randomization between complex traits and  
479 diseases. *Nat Genet.* 2018;50:693–8.

480 37. Kamat MA, Blackshaw JA, Young R, Surendran P, Burgess S, Danesh J, et al. PhenoScanner  
481 V2: an expanded tool for searching human genotype–phenotype associations. *Bioinformatics.*  
482 2019;35:4851–3.

483 38. Mounier N, Kutalik Z. Bias correction for inverse variance weighting Mendelian  
484 randomization. *Genet Epidemiol.* 2023;47:314–31.

485 39. Xu J, Chen Y-Q, Zhao S-P, Liu L. Determination of optimal cut-off points after a high-fat  
486 meal corresponding to fasting elevations of triglyceride and remnant cholesterol in Chinese  
487 subjects. *Lipids in Health and Disease.* 2019;18:206.

488 40. Antoch MP, Wrobel M, Kuropatwinski KK, Gitlin I, Leonova KI, Toshkov I, et al.  
489 Physiological frailty index (PFI): quantitative in-life estimate of individual biological age in  
490 mice. *Aging (Albany NY).* 2017;9:615–26.



491 41. Henderson YO, Bithi N, Yang J, Link C, Zhang A, Baron B, et al. A long-term obesogenic  
492 high-fat diet in mice partially dampens the anti-frailty benefits of late-life intermittent fasting.  
493 Geroscience. 2022;45:1247–62.

494 42. Lee SJ, Kim S-E, Go T-H, Kang DR, Jeon H-S, Kim Y-I, et al. Remnant cholesterol, LDL  
495 cholesterol and incident cardiovascular disease among Koreans: a national population-based  
496 study. Eur J Prev Cardiol. 2023;zwad036.

497 43. Huh JH, Han K, Cho YK, Roh E, Kang JG, Lee SJ, et al. Remnant cholesterol and the risk of  
498 cardiovascular disease in type 2 diabetes: a nationwide longitudinal cohort study. Cardiovasc  
499 Diabetol. 2022;21:228.

500 **Table 1.** Population characteristics across frailty status.

| <b>Characteristics</b> | <b>Total<br/>(N = 17052)</b> | <b>Non-Frailty<br/>(N = 13233)</b> | <b>Frailty<br/>(N = 3819)</b> | <b>P-value</b>  |
|------------------------|------------------------------|------------------------------------|-------------------------------|-----------------|
| <b>Age, years</b>      | 59 (11.90)                   | 57 (11.46)                         | 63 (12.38)                    | <b>2.05E-30</b> |
| <b>Gender</b>          |                              |                                    |                               | <b>1.16E-18</b> |
| Female                 | 6059 (52.43%)                | 3973 (49.31%)                      | 2086 (61.84%)                 |                 |
| Male                   | 5779 (47.57%)                | 4282 (50.69%)                      | 1497 (38.16%)                 |                 |
| <b>Ethnicity</b>       |                              |                                    |                               | <b>2.63E-13</b> |
| White                  | 5545 (73.78%)                | 3869 (75.30%)                      | 1676 (69.17%)                 |                 |
| Black                  | 2389 (9.60%)                 | 1520 (8.18%)                       | 869 (13.90%)                  |                 |
| Other                  | 3904 (16.62%)                | 2866 (16.52%)                      | 1038 (16.93%)                 |                 |
| <b>Education level</b> |                              |                                    |                               | <b>2.66E-22</b> |
| Below High School      | 3397 (17.66%)                | 2043 (14.39%)                      | 1354 (27.54%)                 |                 |

|                              |               |               |               |          |
|------------------------------|---------------|---------------|---------------|----------|
| High School and above        | 8441 (82.34%) | 6212 (85.61%) | 2229 (72.46%) |          |
| <b>Marital status</b>        |               |               |               | 2.49E-18 |
| Non-Married                  | 5056 (37.01%) | 3143 (33.09%) | 1913 (48.86%) |          |
| Married                      | 6782 (62.99%) | 5112 (66.91%) | 1670 (51.14%) |          |
| <b>Family income</b>         |               |               |               | 8.30E-50 |
| Poor                         | 2012 (10.47%) | 1108 (7.55%)  | 904 (19.27%)  |          |
| Near poor                    | 3375 (19.96%) | 2048 (16.06%) | 1327 (31.75%) |          |
| Non-poor                     | 6451 (69.57%) | 5099 (76.39%) | 1352 (48.98%) |          |
| <b>Smoking status</b>        |               |               |               | 2.33E-15 |
| Never                        | 5980 (50.35%) | 4392 (53.18%) | 1588 (41.78%) |          |
| Former                       | 3703 (31.48%) | 2495 (30.78%) | 1208 (33.61%) |          |
| Current                      | 2155 (18.17%) | 1368 (16.04%) | 787 (24.61%)  |          |
| <b>BMI, kg/m<sup>2</sup></b> | 29 (6.64)     | 29 (6.05)     | 31 (7.86)     | 1.81E-21 |
| <b>SBP, mmHg</b>             | 126 (18.40)   | 125 (17.69)   | 129 (20.06)   | 1.41E-15 |
| <b>DBP, mmHg</b>             | 70 (11.69)    | 71 (11.18)    | 68 (12.88)    | 7.33E-16 |
| <b>HEI-2015</b>              |               |               |               | 1.07E-12 |
| Quartile 1                   | 2960 (26.04%) | 1929 (24.80%) | 1031 (29.78%) |          |
| Quartile 2                   | 2959 (24.67%) | 1961 (23.65%) | 998 (27.75%)  |          |
| Quartile 3                   | 2959 (24.49%) | 2108 (24.36%) | 851 (24.89%)  |          |
| Quartile 4                   | 2960 (24.80%) | 2257 (27.20%) | 703 (17.58%)  |          |

|                               |                |                |                |          |
|-------------------------------|----------------|----------------|----------------|----------|
| <b>eGFR, ml/min per 1.73</b>  |                |                |                | 4.68E-46 |
| <b>m<sup>2</sup></b>          |                |                |                |          |
| ≥ 90                          | 5104 (43.56%)  | 3895 (45.87%)  | 1209 (36.60%)  |          |
| 60 to 89                      | 5106 (45.58%)  | 3633 (47.14%)  | 1473 (40.90%)  |          |
| < 60                          | 1628 (10.85%)  | 727 (7.00%)    | 901 (22.50%)   |          |
| <b>Type 2 DM</b>              | 2188 (13.96%)  | 883 (8.15%)    | 1305 (31.49%)  | 8.66E-49 |
| <b>CVD</b>                    | 2100 (14.75%)  | 692 (7.81%)    | 1408 (35.69%)  | 1.57E-52 |
| <b>Statins use</b>            | 3296 (26.63%)  | 1830 (21.86%)  | 1466 (41.01%)  | 4.36E-26 |
| <b>Anti-diabetic drug use</b> | 2012 (13.20%)  | 837 (8.11%)    | 1175 (28.56%)  | 1.62E-43 |
| <b>Anti-hypertensive</b>      | 1122 (8.49%)   | 680 (7.45%)    | 442 (11.62%)   | 2.61E-08 |
| <b>drug use</b>               |                |                |                |          |
| <b>TG, mg/dl</b>              | 109 (76, 158)  | 105 (74, 153)  | 121 (86, 175)  | 1.54E-15 |
| <b>TC, mg/dl</b>              | 197.94 (41.36) | 200.41 (39.95) | 190.49 (44.51) | 8.45E-16 |
| <b>HDL-C, mg/dl</b>           | 55.64 (17.05)  | 56.41 (16.85)  | 53.33 (17.43)  | 2.84E-10 |
| <b>LDL-C, mg/dl</b>           |                |                |                |          |
| Martin-Hopkins                | 118.97 (35.72) | 121.10 (34.57) | 112.54 (38.28) | 9.28E-16 |
| Friedewald                    | 117.17 (36.32) | 119.70 (35.11) | 109.53 (38.77) | 3.83E-19 |
| Sampson                       | 119.71 (36.29) | 122.14 (35.17) | 112.38 (38.57) | 5.84E-18 |
| <b>RC, mg/dl</b>              |                |                |                |          |
| Martin-Hopkins                | 23.33 (8.92)   | 22.90 (8.69)   | 24.62 (9.47)   | 2.45E-10 |
| Friedewald                    | 25.13 (13.51)  | 24.30 (13.08)  | 27.63 (14.45)  | 1.54E-15 |
| Sampson                       | 22.59 (11.79)  | 21.86 (11.45)  | 24.78 (12.49)  | 3.90E-17 |

**RC to TC Ratio, %**

|                |                     |                     |                     |          |
|----------------|---------------------|---------------------|---------------------|----------|
| Martin-Hopkins | 11.15 (8.86, 14.31) | 10.71 (8.61, 13.74) | 12.47 (9.92, 15.51) | 1.91E-28 |
| Friedewald     | 11.21 (7.93, 16.17) | 10.63 (7.62, 15.36) | 13.27 (9.44, 18.39) | 4.44E-28 |
| Sampson        | 10.30 (7.39, 14.56) | 9.74 (7.04, 13.83)  | 12.13 (8.75, 16.38) | 2.45E-29 |

**RC to LDL-C Ratio,**

%

|                |                      |                      |                      |          |
|----------------|----------------------|----------------------|----------------------|----------|
| Martin-Hopkins | 18.78 (14.95, 24.31) | 17.95 (14.40, 23.27) | 21.32 (16.93, 27.39) | 1.49E-33 |
| Friedewald     | 18.81 (13.15, 28.14) | 17.65 (12.50, 26.35) | 22.74 (16.06, 33.69) | 3.35E-33 |
| Sampson        | 17.15 (12.16, 24.86) | 15.99 (11.51, 23.47) | 20.70 (14.80, 29.47) | 5.77E-34 |

501 **Notes:** Percentages, mean value, and standard deviation were weighted and accounted for the  
502 complex sampling design. Sample size was unweighted. BMI, body mass index; RC, remnant  
503 cholesterol; TC, total cholesterol; LDL-C, low-density lipoprotein cholesterol; HEI-2015, Healthy  
504 Eating Index-2015; CVD, cardiovascular disease; DM, diabetes mellitus; eGFR, estimated  
505 glomerular filtration rate; SBP, systolic blood pressure; DBP, diastolic blood pressure.

506 **Table 2.** Bidirectional MR analyses for the association between RC and FI.

| <b>Methods</b>            | <b><math>\beta</math> (95% CI)</b> | <b><i>P</i>-value</b> |
|---------------------------|------------------------------------|-----------------------|
| <b>Effect of RC on FI</b> |                                    |                       |
| IVW                       | 0.059 (0.033, 0.085)               | 1.05E-05***           |
| MR-Egger                  | 0.058 (0.015, 0.100)               | 0.011*                |
| Weighted median           | 0.063 (0.032, 0.093)               | 5.18E-05***           |
| Simple median             | 0.083 (0.050, 0.117)               | 1.61E-06***           |
| MR-PRESSO                 | 0.059 (0.033, 0.085)               | 5.67E-05***           |

|                           |                         |             |
|---------------------------|-------------------------|-------------|
| MRlap                     | 0.061 (0.036, 0.086)    | 9.81E-07*** |
| <b>Effect of FI on RC</b> |                         |             |
| IVW                       | -0.140 (-0.293, 0.014)  | 0.075       |
| MR-Egger                  | -0.989 (-1.477, -0.502) | 0.001**     |
| Weighted median           | -0.137 (-0.300, 0.025)  | 0.113       |
| Simple median             | -0.079 (-0.235, 0.077)  | 0.358       |
| MR-PRESSO                 | -0.140 (-0.293, 0.014)  | 0.095       |
| MRlap                     | 0.030 (-0.170, 0.230)   | 0.772       |

507 **Notes:** The effect size ( $\beta$ ) is per 1 mmol/L increase in RC. IVW, inverse-variance-weighted;  
508 MR-PRESSO, Mendelian Randomization-Pleiotropy RESidual Sum and Outlier; CI, confidence  
509 interval; RC, remnant cholesterol; FI, frailty index. \*, <0.05; \*\*, <0.01; \*\*\*, <0.001.

510

511

512

513 **Table 3.** Multivariable MR analyses for the Causal Effect of RC on FI.

| <b>Adjustment</b> | <b><math>\beta</math> (95% CI)</b> | <b>P-value</b> |
|-------------------|------------------------------------|----------------|
| TC and LDL-C      | 0.086 (0.012, 0.161)               | 0.024*         |
| CHD               | 0.032 (0.006, 0.058)               | 0.001**        |
| HF                | 0.043 (0.018, 0.067)               | 5.67E-04***    |
| Stroke            | 0.051 (0.025, 0.076)               | 9.05E-05***    |
| T2DM              | 0.068 (0.027, 0.108)               | 0.001**        |
| BMI               | 0.069 (0.031, 0.107)               | 2.11E-04***    |

|     |                      |          |
|-----|----------------------|----------|
| SBP | 0.047 (0.021, 0.073) | 4.30E-04 |
| DBP | 0.041 (0.015, 0.067) | 0.002**  |

514 **Notes:** The effect size ( $\beta$ ) is per 1 mmol/L increase in RC. LDL-C, low-density lipoprotein  
515 cholesterol; TC, total cholesterol; T2DM, type 2 diabetes mellitus; HF, heart failure; BMI, body  
516 mass index. \*, <0.05; \*\*, <0.01; \*\*\*, <0.001.

517 **Figure legends**

518 **Figure 1.** Flowchart of Participant Inclusion and Exclusion

519 **Figure 2.** Forest Plot for Association of RC, RC-to-TC ratio, and RC-to-LDL-C ratio with the  
520 Frailty. The value of LDL-C was calculated using the Martin-Hopkins equation. Model 1  
521 adjusted for age (continuous), gender (female and male), ethnicity (white, black, or  
522 other), education level (below high school, or high school and above), family income  
523 (poor, near poor, or non-poor), and marital status (non-married or married). Model 2  
524 adjusted for the variables in model 1 plus smoking status (**never, former, and current**) and  
525 HEI-2015 (quartile). Model 3 adjusted for the variables in model 2 plus BMI  
526 (**continuous**), SBP (continuous), DBP (continuous), eGFR level ( $\geq 90$ , 60 to 89, and < 60  
527 ml/min per 1.73 m<sup>2</sup>), CVD (no or yes), DM (no or yes), statins use (no or yes), anti-  
528 Diabetic drug use (no or yes), and anti-Hypertensive drug use (no or yes). Model 4  
529 adjusted for the variables in model 3 plus TC (continuous) and LDL-C (continuous). OR,  
530 odds ratio; CI, confidence interval; RC, remnant cholesterol; TC, total cholesterol; LDL-  
531 C, low-density lipoprotein cholesterol.

532 **Figure 3.** Restricted Cubic Spline Curves for Association of RC with the Frailty. (A) Association  
533 of RC with the likelihood of frailty, (B) Association of RC to TC ratio with the likelihood

534 of frailty, (C) Association of RC to LDL-C ratio with the likelihood of frailty. (D)  
535 Association of RC with the FI, (E) Association of RC to TC ratio with the FI, (F)  
536 Association of RC to LDL-C ratio with the FI. The models adjusted for age (continuous),  
537 gender (female and male), ethnicity (white, black, or other), ethnicity (white, black, or  
538 other), education level (below high school, or high school and above), marital status  
539 (non-married or married), smoking status (never, former, and current), HEI-2015  
540 (quartile), BMI (continuous), SBP (continuous), DBP (continuous), eGFR level ( $\geq 90$ , 60  
541 to 89, and  $< 60$  ml/min per 1.73 m<sup>2</sup>), CVD (no or yes), DM (no or yes), statins use (no or  
542 yes), anti-Diabetic drug use (no or yes), and anti-Hypertensive drug use (no or yes). For  
543 RC, the model additionally adjusted for TC (continuous) and LDL-C (continuous). OR,  
544 odds ratio; CI, confidence interval; RC, remnant cholesterol; TC, total cholesterol; LDL-  
545 C, low-density lipoprotein cholesterol.

546 **Figure 4.** Forest Plot for Subgroup Analyses of the Association Between RC and Frailty.

547 Adjusted for age (continuous), gender (female and male), ethnicity (white, black, or  
548 other), education level (below high school, or high school and above), marital status  
549 (non-married or married), smoking status (never, former, and current), HEI-2015  
550 (quartile), BMI (continuous), SBP (continuous), DBP (continuous), eGFR level ( $\geq 90$ , 60  
551 to 89, and  $< 60$  ml/min per 1.73 m<sup>2</sup>), CVD (no or yes), DM (no or yes), statins use (no or  
552 yes), anti-Diabetic drug use, anti-Hypertensive drug use, TC (continuous), and LDL-C  
553 (continuous), except the subgroup variable. *P*-value for interaction was corrected for false  
554 discovery rate (FDR)-based multiple hypothesis testing. \*,  $< 0.05$ ; \*\*,  $< 0.01$ ; \*\*\*,  $<$   
555 0.001.

## ● 7% Overall Similarity

Top sources found in the following databases:

- 7% Internet database
- 4% Publications database
- Crossref database
- Crossref Posted Content database

### TOP SOURCES

The sources with the highest number of matches within the submission. Overlapping sources will not be displayed.

|   |                                                                                               |     |
|---|-----------------------------------------------------------------------------------------------|-----|
| 1 | <b>frontiersin.org</b><br>Internet                                                            | 1%  |
| 2 | <b>Yuanlong Hu, Xiaojie Wang, Jiaming Huan, Lei Zhang, Lin Lin, Yuan Li, ...</b><br>Crossref  | <1% |
| 3 | <b>assets.researchsquare.com</b><br>Internet                                                  | <1% |
| 4 | <b>link.springer.com</b><br>Internet                                                          | <1% |
| 5 | <b>researchsquare.com</b><br>Internet                                                         | <1% |
| 6 | <b>portlandpress.com</b><br>Internet                                                          | <1% |
| 7 | <b>D. Gottesman, D. I. McIsaac. "Frailty and emergency surgery: identifica...</b><br>Crossref | <1% |
| 8 | <b>academic.oup.com</b><br>Internet                                                           | <1% |
| 9 | <b>translational-medicine.biomedcentral.com</b><br>Internet                                   | <1% |



|    |                                          |          |     |
|----|------------------------------------------|----------|-----|
| 10 | <b>jfrailtyaging.com</b>                 | Internet | <1% |
| 11 | <b>content.iospress.com</b>              | Internet | <1% |
| 12 | <b>ncbi.nlm.nih.gov</b>                  | Internet | <1% |
| 13 | <b>researchgate.net</b>                  | Internet | <1% |
| 14 | <b>bmcoralhealth.biomedcentral.com</b>   | Internet | <1% |
| 15 | <b>bmcpublichealth.biomedcentral.com</b> | Internet | <1% |
| 16 | <b>repub.eur.nl</b>                      | Internet | <1% |
| 17 | <b>static.frontiersin.org</b>            | Internet | <1% |
| 18 | <b>topsecretapiaccess.dovepress.com</b>  | Internet | <1% |
| 19 | <b>science.gov</b>                       | Internet | <1% |
